# Supplementary material for: MASCOT: parameter and state inference under the marginal structured coalescent approximation
Source: PubMed Central journal article supplement — Bioinformatics. 2018 May 22;34(22):3843–8. doi: 10.1093/bioinformatics/bty406 (PMC6223361; doi:10.1093/bioinformatics/bty406), 2018-05-22
Supplement: bty406_supplementary_data.pdf [file bty406_supplementary_data.pdf]

# MASCOT: Parameter and state inference under the marginal structured coalescent approximation: Supplementary Material

Nicola F. Müller<sup>1,2,\*</sup>, David Rasmussen<sup>1,2,3,4</sup>, and Tanja Stadler<sup>1,2,\*</sup>

<sup>1</sup>ETH Zurich, Department of Biosystems Science and Engineering, 4058 Basel, Switzerland

<sup>2</sup>Swiss Institute of Bioinformatics (SIB), Switzerland

<sup>3</sup>Department of Entomology and Plant Pathology, North Carolina State University, Raleigh, North Carolina, USA

<sup>4</sup>Bioinformatics Research Center, North Carolina State University, Raleigh, North Carolina, USA

<sup>1</sup>Corresponding authors

## 1 Derivation of the derivative of the conditional lineage state probabilities

$$\begin{aligned}
 P_t(L_i = l_i|T) &= \frac{P_t(L_i = l_i, T)}{\sum_{a=1}^n P_t(L_i = a, T)} = \frac{P_t(L_i = l_i, T)}{P_t(T)} \\
 \frac{d}{dt} P_t(L_i = l_i|T) &= \frac{d}{dt} \frac{P_t(L_i = l_i, T)}{P_t(T)} = \frac{P_t(T) \frac{d}{dt} P_t(L_i = l_i, T) - P_t(L_i = l_i, T) \frac{d}{dt} P_t(T)}{P_t(T)^2} \\
 &= \frac{\frac{d}{dt} P_t(L_i = l_i, T)}{P_t(T)} - \frac{P_t(L_i = l_i|T) \frac{d}{dt} P_t(T)}{P_t(T)}
 \end{aligned}$$

$\frac{\frac{d}{dt} P_t(L_i = l_i, T)}{P_t(T)}$  can be received by dividing equation 3 in Müller et al. (2017) with  $P_t(T)$ :

$$\begin{aligned}
 \frac{\frac{d}{dt} P_t(L_i = l_i, T)}{P_t(T)} &= \sum_{a=1}^m \left( \mu_{al_i} P_t(L_i = a|T) - \mu_{l_i a} P_t(L_i = l_i|T) \right) \\
 &\quad - P_t(L_i = l_i|T) \sum_{a=1}^m \frac{\lambda_a}{2} \sum_{\substack{j=1 \\ j \neq i}}^n \sum_{\substack{k=1 \\ k \neq j, i}}^n P_t(L_j = a|T) P_t(L_k = a|T) \\
 &\quad - P_t(L_i = l_i|T) \lambda_{l_i} \sum_{\substack{k=1 \\ k \neq i}}^n P_t(L_k = l_i|T)
 \end{aligned} \tag{1}$$

The same way, we can derive  $\frac{P_t(L_i = l_i|T) \frac{d}{dt} \sum_{a=1}^n P_t(L_i = a, T)}{P_t(T)}$  from equation 3 in Müller et al. (2017):

$$\begin{aligned}
 \frac{P_t(L_i = l_i|T) \frac{d}{dt} \sum_{a=1}^n P_t(L_i = a, T)}{P_t(T)} &= \frac{P_t(L_i = l_i|T)}{P_t(T)} \left[ \sum_{a=1}^m \sum_{b=1}^m \left( \mu_{ba} P_t(L_i = b, T) - \mu_{ab} P_t(L_i = a, T) \right) (= 0) \right. \\
 &\quad - \sum_{a=1}^m P_t(L_i = a, T) \sum_{b=1}^m \frac{\lambda_b}{2} \sum_{\substack{j=1 \\ j \neq i}}^n \sum_{\substack{k=1 \\ k \neq j, i}}^n P_t(L_j = b|T) P_t(L_k = b|T) \\
 &\quad \left. - \sum_{a=1}^m P_t(L_i = a, T) \lambda_a \sum_{\substack{k=1 \\ k \neq i}}^n P_t(L_k = a|T) \right] \\
 &= -\frac{P_t(L_i = l_i|T)}{P_t(T)} \left[ P_t(T) \sum_{b=1}^m \frac{\lambda_b}{2} \sum_{\substack{j=1 \\ j \neq i}}^n \sum_{\substack{k=1 \\ k \neq j, i}}^n P_t(L_j = b|T) P_t(L_k = b|T) \right. \\
 &\quad \left. + P_t(T) \sum_{a=1}^m P_t(L_i = a|T) \lambda_a \sum_{\substack{k=1 \\ k \neq i}}^n P_t(L_k = a|T) \right] \\
 &= -P_t(L_i = l_i|T) \frac{P_t(T)}{P_t(T)} \sum_{a=1}^m \frac{\lambda_a}{2} \sum_{j=1}^n \sum_{\substack{k=1 \\ k \neq j}}^n P_t(L_j = a|T) P_t(L_k = a|T) \tag{2}
 \end{aligned}$$

Combining equations 1 and 2 then yields:

$$\begin{aligned}
\frac{\frac{d}{dt}P_t(L_i = l_i, T)}{P_t(T)} - \frac{P_t(L_i = l_i|T)\frac{d}{dt}P_t(T)}{P_t(T)} &= \sum_{a=1}^m \left( \mu_{al_i}P_t(L_i = a|T) - \mu_{l_i a}P_t(L_i = l_i|T) \right) \\
&\quad - P_t(L_i = l_i|T) \sum_{a=1}^m \frac{\lambda_a}{2} \sum_{\substack{j=1 \\ j \neq i}}^n \sum_{\substack{k=1 \\ k \neq j, i}}^n P_t(L_j = a|T)P_t(L_k = a|T) \\
&\quad - P_t(L_i = l_i|T)\lambda_{l_i} \sum_{\substack{k=1 \\ k \neq i}}^n P_t(L_k = l_i|T) \\
&\quad + P_t(L_i = l_i|T) \frac{P_t(T)}{P_t(T)} \sum_{a=1}^m \frac{\lambda_a}{2} \sum_{\substack{j=1 \\ k \neq j}}^n \sum_{\substack{k=1 \\ k \neq j}}^n P_t(L_j = a|T)P_t(L_k = a|T) \\
&= \sum_{a=1}^m \left( \mu_{al_i}P_t(L_i = a|T) - \mu_{l_i a}P_t(L_i = l_i|T) \right) \\
&\quad + P_t(L_i = l_i|T) \sum_{a=1}^m \lambda_a P_t(L_i = a|T) \sum_{\substack{k=1 \\ k \neq i}}^n P_t(L_k = a|T) \\
&\quad - P_t(L_i = l_i|T)\lambda_{l_i} \sum_{\substack{k=1 \\ k \neq i}}^n P_t(L_k = l_i|T)
\end{aligned} \tag{3}$$

## 2 Derivation of the derivative of $P_t(T)$

The expression for  $\frac{d}{dt}P_t(T)$  can be easily derived from  $\frac{d}{dt}P_t(L_i = a, T)$ , by summing over every possible state  $a$ :

$$\frac{d}{dt}P_t(T) = \sum_{a=1}^m \frac{d}{dt}P_t(L_i = a, T) = \frac{d}{dt} \sum_{a=1}^m P_t(L_i = a, T)$$

This summation was done for deriving equation 2, and thus, we showed that:

$$\frac{d}{dt}P_t(T) = -P_t(T) \sum_{b=1}^m \frac{\lambda_b}{2} \sum_{j=1}^n \sum_{\substack{k=1 \\ k \neq j}}^n P_t(L_j = b|T)P_t(L_k = b|T)$$

### 3 Derivation of the second derivative

The second derivative can be easily received by taking the derivative of equation 3 in this supplement with respect to time:

$$\begin{aligned}
\frac{d^2 P_t(L_i = l_i|T)}{dt^2} &= \frac{d}{dt} \left( \sum_{a=1}^m \left( \mu_{al_i} P_t(L_i = a|T) - \mu_{l_i a} P_t(L_i = l_i|T) \right) \right) \\
&+ \frac{d}{dt} \left( P_t(L_i = l_i|T) \sum_{a=1}^m \lambda_a P_t(L_i = a|T) \sum_{\substack{k=1 \\ k \neq i}}^n P_t(L_k = a|T) \right) \\
&- \frac{d}{dt} \left( P_t(L_i = l_i|T) \lambda_{l_i} \sum_{\substack{k=1 \\ k \neq i}}^n P_t(L_k = l_i|T) \right) \\
&= \sum_{a=1}^m \left( \mu_{al_i} \frac{d}{dt} P_t(L_i = a|T) - \mu_{l_i a} \frac{d}{dt} P_t(L_i = l_i|T) \right) \\
&+ \frac{d}{dt} P_t(L_i = l_i|T) \left( \sum_{a=1}^m \lambda_a P_t(L_i = a|T) \sum_{\substack{k=1 \\ k \neq i}}^n P_t(L_k = a|T) \right) \\
&+ P_t(L_i = l_i|T) \left( \sum_{a=1}^m \lambda_a \frac{d}{dt} P_t(L_i = a|T) \sum_{\substack{k=1 \\ k \neq i}}^n P_t(L_k = a|T) \right) \\
&+ P_t(L_i = l_i|T) \left( \sum_{a=1}^m \lambda_a P_t(L_i = a|T) \sum_{\substack{k=1 \\ k \neq i}}^n \frac{d}{dt} P_t(L_k = a|T) \right) \\
&- P_t(L_i = l_i|T) \lambda_{l_i} \frac{d}{dt} \sum_{\substack{k=1 \\ k \neq i}}^n P_t(L_k = l_i|T) \\
&- \frac{d}{dt} P_t(L_i = l_i|T) \lambda_{l_i} \sum_{\substack{k=1 \\ k \neq i}}^n P_t(L_k = l_i|T)
\end{aligned} \tag{4}$$

## 4 Approximation of the third derivative

In order to get a fast estimate of the step size, we make two assumptions: We assume that the sum of probability mass in a state over all lineages but lineage  $i$  does not change and that the sum of the derivatives of lineage  $i$  coalescing in any state does not change, meaning:

$$\begin{aligned} \frac{d}{dt} \sum_{\substack{k=1 \\ k \neq i}}^n P_t(L_k = a|T) &= 0 \\ \frac{d}{dt} \sum_{a=1}^m \lambda_a P_t(L_i = a|T) \sum_{\substack{k=1 \\ k \neq i}}^n P_t(L_k = a|T) &= 0 \end{aligned} \tag{5}$$

This assumption only affects the step size used for integration and allows us to simplify equation 4 to:

$$\begin{aligned} \frac{d^2 P_t(L_i = l_i|T)}{dt^2} &\approx \sum_{a=1}^m \left( \mu_{al_i} \frac{d}{dt} P_t(L_i = a|T) - \mu_{l_i a} \frac{d}{dt} P_t(L_i = l_i|T) \right) \\ &\quad + \frac{d}{dt} P_t(L_i = l_i|T) \left( \sum_{a=1}^m \lambda_a P_t(L_i = a|T) \sum_{\substack{k=1 \\ k \neq i}}^n P_t(L_k = a|T) \right) \\ &\quad - \lambda_{l_i} \sum_{\substack{k=1 \\ k \neq i}}^n P_t(L_k = l_i|T) \frac{d}{dt} P_t(L_i = l_i|T) \end{aligned}$$

Again taking the derivative with respect to time then yields:

$$\begin{aligned} \frac{d^3 P(L_i = l_i|T)}{dt^3} &\approx \frac{d}{dt} \sum_{a=1}^m \left( \mu_{al_i} \frac{d}{dt} P_t(L_i = a|T) - \mu_{l_i a} \frac{d}{dt} P_t(L_i = l_i|T) \right) \\ &\quad + \frac{d}{dt} \left( \frac{d}{dt} P_t(L_i = l_i|T) \left( \sum_{a=1}^m \lambda_a P_t(L_i = a|T) \sum_{\substack{k=1 \\ k \neq i}}^n P_t(L_k = a|T) \right) \right) \\ &\quad - \frac{d}{dt} \left( \frac{d}{dt} P_t(L_i = l_i|T) \lambda_{l_i} \sum_{\substack{k=1 \\ k \neq i}}^n P_t(L_k = l_i|T) \right) \\ &= \sum_{a=1}^m \left( \mu_{al_i} \frac{d^2}{dt^2} P_t(L_i = a|T) - \mu_{l_i a} \frac{d^2}{dt^2} P_t(L_i = l_i|T) \right) \\ &\quad + \frac{d^2}{dt^2} P_t(L_i = l_i|T) \left( \sum_{a=1}^m \lambda_a P_t(L_i = a|T) \sum_{\substack{k=1 \\ k \neq i}}^n P_t(L_k = a|T) \right) \\ &\quad + \frac{d}{dt} P_t(L_i = l_i|T) \left( \frac{d}{dt} \sum_{a=1}^m \lambda_a P_t(L_i = a|T) \sum_{\substack{k=1 \\ k \neq i}}^n P_t(L_k = a|T) \right) \\ &\quad - \frac{d^2}{dt^2} P_t(L_i = l_i|T) \lambda_{l_i} \sum_{\substack{k=1 \\ k \neq i}}^n P_t(L_k = l_i|T) \\ &\quad - \frac{d}{dt} P_t(L_i = l_i|T) \lambda_{l_i} \frac{d}{dt} \sum_{\substack{k=1 \\ k \neq i}}^n P_t(L_k = l_i|T) \end{aligned}$$

Using again the assumptions of 5, we can write:

$$\begin{aligned}
\frac{d^3 P(L_i = l_i | T)}{dt^3} &\approx \sum_{a=1}^m \left( \mu_{al_i} \frac{d^2}{dt^2} P_t(L_i = a | T) - \mu_{l_i a} \frac{d^2}{dt^2} P_t(L_i = l_i | T) \right) \\
&+ \frac{d^2}{dt^2} P_t(L_i = l_i | T) \left( \sum_{a=1}^m \lambda_a P_t(L_i = a | T) \sum_{\substack{k=1 \\ k \neq i}}^n P_t(L_k = a | T) \right) \\
&- \frac{d^2}{dt^2} P(L_i = l_i | T) \lambda_{l_i} \sum_{\substack{k=1 \\ k \neq i}}^n P_t(L_k = l_i | T)
\end{aligned}$$

## References

Müller, N. F., Rasmussen, D. A., and Stadler, T. (2017). The structured coalescent and its approximations. Molecular Biology and Evolution, page msx186.
